# Supplementary material
Source: publisher site journal article supplement (https://www.dovepress.com/article/615866)
Supplement: Supplementary file 1 [file 615866%20Revised%20%2509Supplementary%20Material.docx]

# Supplementary materials

## **Table S1.** List of codes to identify conditions of interest

| **Condition** | **ICD-10-CM** | **HCPCS** |
| --- | --- | --- |
| MM | C90.0 |  |
| Amyloidosis | E85.x |  |
| Evidence of clinical trial participation |  | S9988, S9990, S9991, S9992, S9994, S9996 |
| Non-ICANS neurologic event |  |  |
| Parkinsonism | G21.x |  |
| Cranial nerve palsy | G51.0, G52.x, G53.3 |  |
| Guillain-Barré syndrome | G61.0 |  |

HCPCS: Healthcare Common Procedure Coding System; ICANS: immune effector cell-associated neurotoxicity syndrome; ICD-10-CM: International Classification of Diseases, 10th Revision, Clinical Modification; MM: multiple myeloma.

## **Table S2.** Neurologic events excluded during the baseline period

| **Neurologic event** | **ICD-10-CM** |
| --- | --- |
| ICANS | G92.0 |
| Tremors | G25.0, G25.2, R25.1 |
| Memory loss | R41.3 |
| Flat affect | R45.89 |
| Parkinsonism | G21.x |
| Seizures | G40.x, R56.x |
| Confusion/delirium | R41.0 |
| Aphasia, speech disorders | R47.x |
| Guillain-Barré syndrome | G61.0 |
| Encephalopathy | G93.4, G93.49 |
| Cranial nerve palsy | G51.0, G52.x, G53.3 |
| Dizziness | R42 |
| Immune-mediated myelitis | G04.0, G04.9 |
| Gait | R26.0, R26.1, R26.2, R26.81, R26.89, R26.9 |

ICANS: immune effector cell-associated neurotoxicity syndrome; ICD-10-CM: International Classification of Diseases, 10th Revision, Clinical Modification.

**Table S3.** Baseline demographic characteristics

|  | **1-3 prior LOT** | | **≥4 prior LOT** | |
| --- | --- | --- | --- | --- |
|  | **Patients who developed non-ICANS NEs** | **Patients who did not develop non-ICANS NEs** | **Patients who developed non-ICANS NEs** | **Patients who did not develop non-ICANS NEs** |
|  | **N = 4** | **N = 69** | **N = 4** | **N = 94** |
| **Age, mean ± SD [median]** | 64.0 ± 4.1 [65.5] | 64.6 ± 9.2 [64.0] | 57.5 ± 7.2 [59.0] | 64.2 ± 8.9 [64.0] |
| **Female, n (%)** | 3 (75.0) | 31 (44.9) | 1 (25.0) | 36 (38.3) |
| **Race, n (%)** |  |  |  |  |
| White | 1 (25.0) | 48 (69.6) | 4 (100.0) | 65 (69.1) |
| Black | 1 (25.0) | 4 (5.8) | 0 (0.0) | 5 (5.3) |
| Asian | 0 (0.0) | 4 (5.8) | 0 (0.0) | 10 (10.6) |
| Other | 2 (50.0) | 13 (18.8) | 0 (0.0) | 14 (14.9) |
| **Payer type, n (%)** |  |  |  |  |
| Medicare | 3 (75.0) | 31 (44.9) | 3 (75.0) | 48 (51.1) |
| Commercial | 1 (25.0) | 29 (42.0) | 1 (25.0) | 32 (34.0) |
| Medicaid | 0 (0.0) | 4 (5.8) | 0 (0.0) | 9 (9.6) |
| Other | 0 (0.0) | 3 (4.3) | 0 (0.0) | 0 (0.0) |
| Unknown | 0 (0.0) | 2 (2.9) | 0 (0.0) | 1 (1.1) |
| **Infusion setting available, n (%)** | 4 (100.0) | 66 (95.7) | 4 (100.0) | 94 (100.0) |
| Inpatient | 4 (100.0) | 36 (54.5) | 1 (25.0) | 70 (74.5) |
| Outpatient | 0 (0.0) | 30 (45.5) | 3 (75.0) | 24 (25.5) |

ICANS: immune effector cell–associated neurotoxicity syndrome; LOT: line of therapy; NE: neurologic event; SD: standard deviation.

**Table S4.** Baseline clinical characteristics

|  | **1-3 prior LOT** | | **≥4 prior LOT** | |
| --- | --- | --- | --- | --- |
|  | **Patients who developed non-ICANS NEs** | **Patients who did not develop non-ICANS NEs** | **Patients who developed non-ICANS NEs** | **Patients who did not develop non-ICANS NEs** |
|  | **N = 4** | **N = 69** | **N = 4** | **N = 94** |
| **Quan-CCI, mean ± SD [median]** | 2.3 ± 0.5 [2.0] | 2.7 ± 1.3 [2.0] | 2.8 ± 1.0 [2.5] | 2.9 ± 1.8 [2.0] |
| **ECOG assessment, n (%)** | 3 (75.0) | 64 (92.8) | 4 (100.0) | 93 (98.9) |
| ECOG score ≥2 | 0 (0.0) | 4 (6.3) | 0 (0.0) | 1 (1.1) |
| **Extramedullary disease assessment, n (%)** | 1 (25.0) | 47 (68.1) | 3 (75.0) | 69 (73.4) |
| Extramedullary disease | 0 (0.0) | 16 (34.0) | 0 (0.0) | 14 (20.3) |
| **Cytogenetic assessment, n (%)** | 2 (50.0) | 41 (59.4) | 3 (75.0) | 46 (48.9) |
| **High-risk cytogenetic abnormalitiesa, n (%)** | 1 (50.0) | 23 (56.1) | 2 (66.7) | 29 (63.0) |
| TP53 mutation | 0 (0.0) | 3 (7.3) | 0 (0.0) | 5 (10.9) |
| del(17p) | 1 (50.0) | 10 (24.4) | 2 (66.7) | 12 (26.1) |
| del(1p32) | 0 (0.0) | 5 (12.2) | 0 (0.0) | 3 (6.5) |
| t[14;16] | 0 (0.0) | 1 (2.4) | 0 (0.0) | 2 (4.3) |
| t[14;20] | 0 (0.0) | 1 (2.4) | 0 (0.0) | 0 (0.0) |
| t[4;14] | 0 (0.0) | 10 (24.4) | 1 (33.3) | 14 (30.4) |
| 1q (amplification or gain) | 1 (50.0) | 30 (73.2) | 3 (100.0) | 34 (73.9) |
| **Involved:uninvolved FLC ratio ≥100, n (%)** | 2 (50.0) | 10 (14.5) | 1 (25.0) | 17 (18.1) |
| **Assessment of clonal plasma cells in bone marrow, n (%)** | 0 (0.0) | 36 (52.2) | 1 (25.0) | 42 (44.7) |
| Clonal plasma cells in bone marrow (%), mean ± SD [median] | - | 17.2 ± 21.4 [8.0] | 19.6 ± . [19.6] | 27.6 ± 27.6 [15.0] |
| **Received bridging therapy, n (%)** | 3 (75.0) | 57 (82.6) | 3 (75.0) | 77 (81.9) |

Quan-CCI: Quan-Charlson Comorbidity Index; ECOG: Eastern Cooperative Oncology Group; FLC: free light chain; ICANS: immune effector cell–associated neurotoxicity syndrome; IMWG: International Myeloma Working Group; LOT: line of therapy; NE: neurologic event; SD: standard deviation.

a Defined as evidence of del(17p) in sorted plasma cells ≥20%, TP53 mutation, biallelic del(1p32) or any two of the following abnormalities: t[4;14] or t[4;16] or t[14;20], 1q (gain or amplification), monoallelic del(1p32).
